# Supplementary material
Source: publisher site journal article supplement (https://www.spandidos-publications.com/3273/downloadSupplementary)
Supplement: Supplementary file 1 [file downloadSupplementary]

Figure S1. PARP1 cleavage is induced by reversine in glioma cells. Bar graphs represent the mean  $\pm$  SD of the ratio of cleaved/total PARP1 band intensities (arbitrary units, A.U.) of 3 independent experiments from HOG, T98G and U251MG cells treated with (A) vehicle (DMSO) or graded concentrations of reversine (vehicle, 1.6, 3.2 or 6.4  $\mu$ M) for 24 h or (B) graded time of exposure (24, 48 and 72 h) to reversine at 1.6  $\mu$ M. \* $P$ <0.05, \*\* $P$ <0.01 and \*\*\* $P$ <0.001. PARP1, poly(ADP-ribose) polymerase 1.

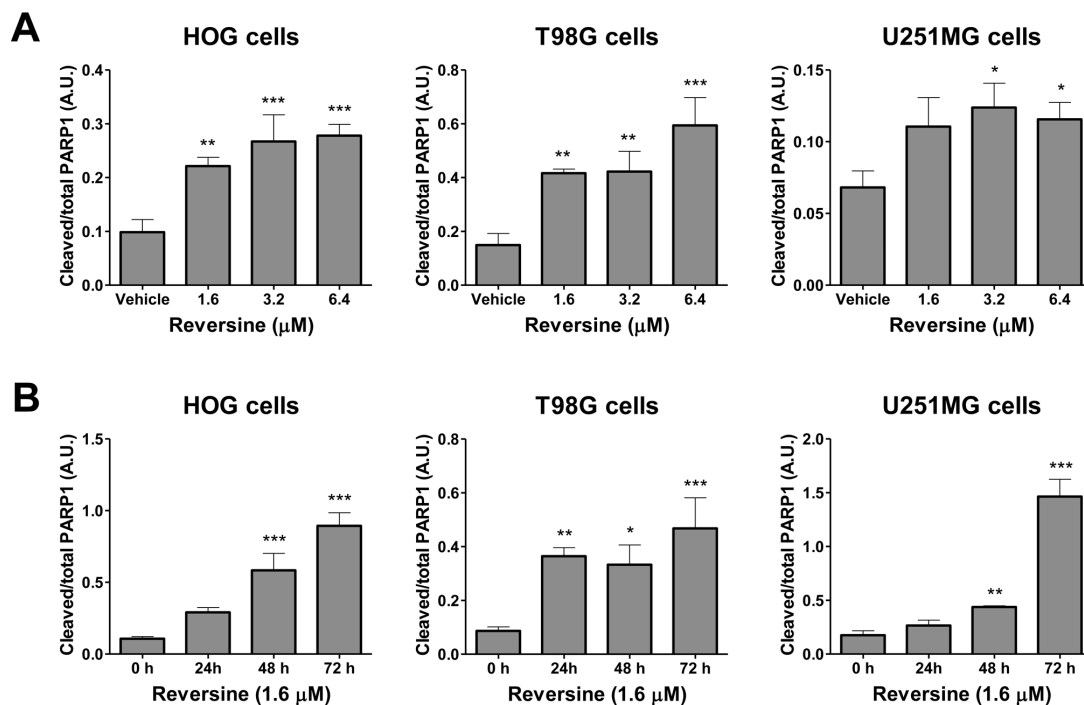

Figure S2. Pan-caspase inhibitor, Z-VAD-FMK, partially attenuated the reversine-induced reduction of cell viability in glioma cells. Cytotoxicity was analyzed using a sulforhodamine B (SRB) assay for HOG, T98G and U251MG cells treated with vehicle (DMSO) or graded concentrations of reversine (0.8, 1.6, 3.2 and 6.4  $\mu$ M) in combination or not with Z-VAD-FMK (20  $\mu$ M) for 48 h. Values are expressed as the percentage of viable cells for each condition relative to vehicle-treated cells. Results are shown as mean  $\pm$  SD of at least 3 independent experiments. \*P<0.05, reversine-, and/or -Z-VAD-FMK vs. vehicle-treated cells; #P<0.05 for reversine- or Z-VAD-FMK-treated cells vs. combination treatment at the corresponding doses.

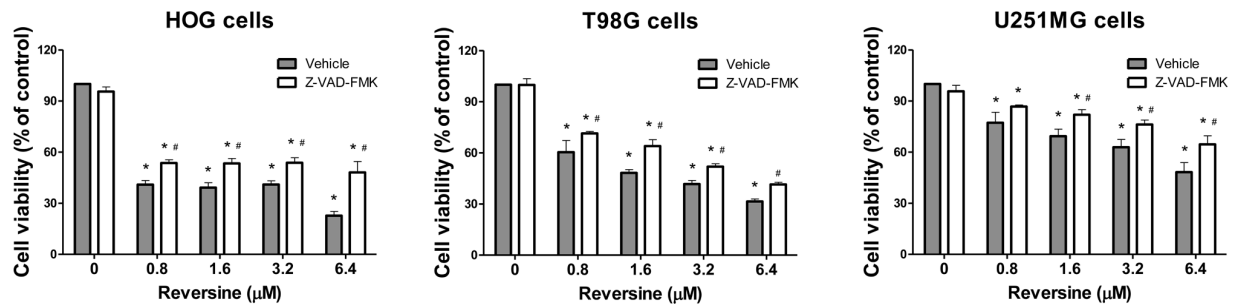

Figure S3. Venetoclax (selective BCL2 inhibitor) or obatoclax (BH3 mimetic) potentiated reversine-induced reduction of cell viability in glioma cells. Cell viability was analyzed using a sulforhodamine B (SRB) assay. (A) Dose-response cytotoxicity for HOG, T98G, and U251MG cells treated with vehicle (DMSO) or graded concentrations of venetoclax (0.1, 0.5, 1, 5, 10 and 50  $\mu$ M) or obatoclax (0.01, 0.03, 0.1, 0.3, 1 and 3  $\mu$ M) for 48 h. Values are expressed as the percentage of viable cells for each condition relative to vehicle-treated cells. (B) HOG, T98G, and U251MG cells treated with vehicle or graded concentrations of reversine (0.8, 1.6, 3.2 and 6.4  $\mu$ M) in combination or not with venetoclax (5  $\mu$ M) or obatoclax (HOG, 10 nM; T98G, 30 nM; and U251MG, 100 nM) for 48 h. Doses between IC<sub>30</sub> and IC<sub>40</sub> for venetoclax and obatoclax were selected for combination studies in each cell line. Values are expressed as the percentage of viable cells for each condition relative to vehicle-treated cells. Results are shown as mean  $\pm$  SD of at least 3 independent experiments. \*P<0.05 for reversine-, venetoclax- and/or obatoclax-treated cells vs. vehicle-treated cells; #P<0.05 for reversine-, venetoclax-, or obatoclax-treated cells vs. combination treatment at the corresponding doses. IC, inhibitory concentration.

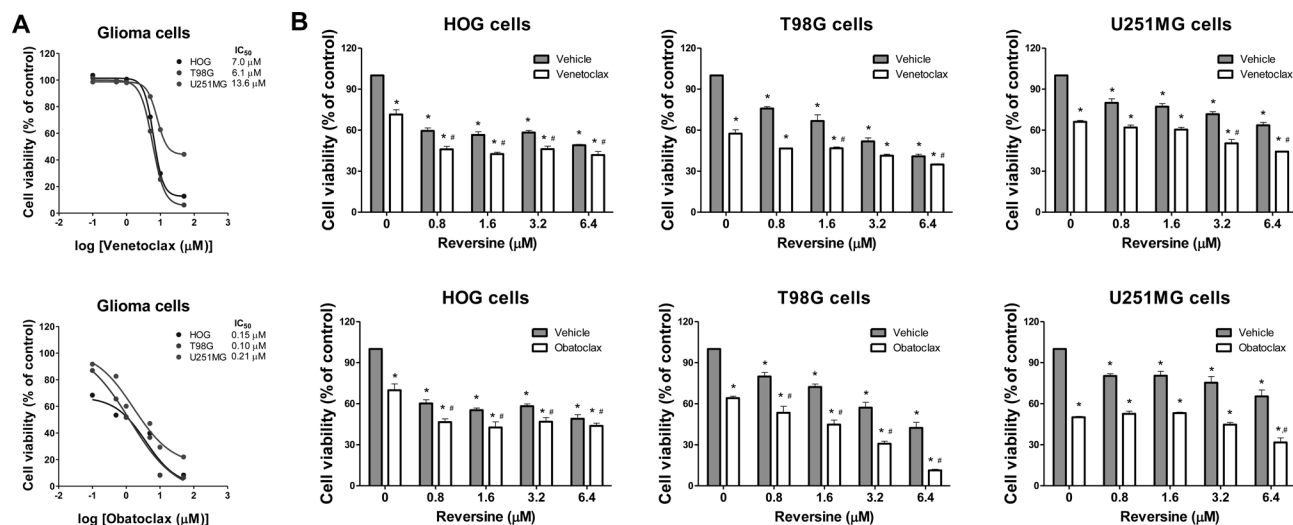

Table SI. RT-qPCR primer sequences and concentrations.

| Gene    | Sequence (5'-3')                                          | Concentration |
|---------|-----------------------------------------------------------|---------------|
| AURKA   | FW: CCACCTTCGGCATCCTAATA<br>RV: TCCAAGTGGTGCATATTCCA      | 300 nM        |
| AURKB   | FW: CCCTGAGGAGGAAGACAATG<br>RV: GCACCACAGATCCACCTTCT      | 300 nM        |
| BCL2    | FW: ATGTGTGTGGAGAGCGTCAA<br>RV: ACAGTTCCACAAAGGCATCC      | 300 nM        |
| BCL2L1  | FW: CTTGGATGGCCACTTACCTGAA<br>RV: GCTGCTGCATTGTTCCCATA    | 300 nM        |
| BIRC5   | FW: GCCCAGTGTTTCTTCTGCTTCA<br>RV: GCACTTTCTCCGCAGTTTCCTC  | 300 nM        |
| BNIP3   | FW: ATATGGGATTGGTCAAGTCGG<br>RV: CGCTCGTGTTCTCATGCT       | 300 nM        |
| BNIP3L  | FW: ACACCAGCAGGGACCATAGC<br>RV: TTTCTTCAAAGCCTCGACTTCC    | 300 nM        |
| BAD     | FW: CACCAGCAGGAGCAGCCAAC<br>RV: CGACTCCGGATCTCCACAGC      | 300 nM        |
| BAX     | FW: GAGCTGCAGAGGATGATTGC<br>RV: CAGCTGCCACTCGGAAAA        | 300 nM        |
| BBC3    | FW: GACCTCAACGCACAGTACGAG<br>RV: AGGAGTCCCATGATGAGATTGT   | 300 nM        |
| PMAIP1  | FW: CGCGCAAGAACGCTCAACC<br>RV: CCACTCGACTTCCAGCTCTGCT     | 300 nM        |
| CDKN1A  | FW: TGTCACTGTCTTGTACCCTTGT<br>RV: GCCGGCGTTTGGAGTGGTAG    | 300 nM        |
| CDKN1B  | FW: ACTCTGAGGACACGCATTTGGT<br>RV: TCTGTTCTGTTGGCTCTTTTGGT | 300 nM        |
| GADD45A | FW: AAGGATGGATAAGGTGGGG<br>RV: CTGGATCAGGGTGAAGTGG        | 300 nM        |
| HPRT1   | FW: GAACGTCTTGCTCGAGATGTGA<br>RV: TCCAGCAGGTCAGCAAAGAAT   | 150 nM        |
| ACTB    | FW: AGGCCAACCGCGAGAAG<br>RV: ACAGCCTGGATAGCAACGTACA       | 150 nM        |

FW, forward; RV, reverse; RT-q, reverse transcription-quantitative; AURKA, aurora kinase A; AURKB, aurora kinase B; BCL2, BCL2 apoptosis regulator; BCL2L1, BCL2 like 1; BIRC5, baculoviral IAP repeat containing 5; BNIP3, BCL2 interacting protein 3; BNIP3L, BCL2 interacting protein 3 like; BAD, BCL2 associated agonist of cell death; BAX, BCL2 associated X, apoptosis regulator; BBC3, BCL2 binding component 3; PMAIP1, phorbol-12-myristate-13-acetate-induced protein 1; CDKN1A, cyclin dependent kinase inhibitor 1A; CDKN1B, cyclin dependent kinase inhibitor 1B; GADD45A, growth arrest and DNA damage inducible gene 45 alpha; HPRT1, hypoxanthine phosphoribosyltransferase 1; ACTB, actin beta.
